1 An Efficient and Robust Approach to Detect Auditory Evoked Responses using  
2 Adaptive Averaging

3

4 Haoyu Wang<sup>1,2#</sup>, Xu Ding<sup>1#</sup>, Bei Li<sup>3#</sup>, Xueling Wang<sup>1,3</sup>, Zhiwu Huang<sup>1,3</sup>, Yunfeng  
5 Hua<sup>1,2\*</sup>, Hao Wu<sup>1,2,3\*</sup>

6

7 <sup>1</sup> Ear Institute, Shanghai Jiao Tong University School of Medicine, Shanghai, China

8 <sup>2</sup> Shanghai Institute of Precision Medicine, Shanghai, China

9 <sup>3</sup> Department of Otolaryngology-Head and Neck Surgery, Shanghai ninth people's  
10 Hospital, Shanghai Jiao Tong University School of Medicine

11 # These authors contribute equally

12 \* Corresponding authors

13

14

15 **ABSTRACT**

16 **Objective:** the auditory brainstem response is widely employed to evaluate hearing  
17 function of test subjects for both clinical and research purposes. Currently, hearing  
18 threshold estimation still relies on trained professionals to assess the audiograms,  
19 resulting in the largest cost component of the test. The objective of this study was to  
20 develop an automated approach to objectively and reliably detect the hearing thresholds.

21 **Design:** From eight mice and four human participants, we recorded for each sound level

22 hundreds of single sweeps and asked how many sweeps were minimum required for a

**NOTE: This preprint reports new research that has not been certified by peer review and should not be used to guide clinical practice.**

23 response being detected from cumulative averages using correlation function. We  
24 named this procedure the adaptive averaging approach.

25 **Result:** We found an exponential increase in the required sweeps at near-threshold  
26 sound levels, modeling of which allowed objective and precise threshold estimation.  
27 The results from mouse and human recordings deviated consistently less than 5 dB  
28 from the expert-assessed values. Moreover, up to 69 % sweeps at suprathreshold sound  
29 tests were found redundant for the threshold estimation and could be avoided to  
30 improve test efficiency.

31 **Conclusions:** The adaptive averaging approach achieved objective and precise hearing  
32 threshold detection and implementation of this approach in commercial recording  
33 devices will automate the hearing test in a more reliable and cost-effective way.

34

35

36

## INTRODUCTION

37 The auditory brainstem responses (ABRs) are brain electrical potential changes due to  
38 the synchronous neuronal activities evoked by suprathreshold acoustic stimuli (Jewett  
39 et al., 1970). In a hearing test, surface electrodes are placed on the scalp of the test  
40 subject to monitor the threshold sound level below which ABRs are no longer  
41 detectable. As a non-invasive technique, the ABR test has been worldwide employed in  
42 hospitals and clinics to exam auditory function, particularly for infants, adults with  
43 learning disabilities as well as patients undergoing operation, to whom a test through  
44 communication or body movements is not applicable (Jacobson et al., 1990). Typical

45 ABR waveform is composed of five peaks in the early onset (up to ten milliseconds) of  
46 sound evoked potentials. These peaks appear to be one millisecond (ms) apart and have  
47 an amplitude of few hundreds nanovolt (nV), corresponding to synchronous activities  
48 arising from (I) auditory nerve, (II) cochlear nucleus, (III) superior olivary complex,  
49 (IV) lateral lemniscus and (V) inferior colliculus, respectively (Basbaum, 2008). Over  
50 decades, the ABR has not only been used to estimate the hearing threshold, also features  
51 of the waveform including peak latencies and amplitudes provide clinically significant  
52 information, for instance hidden hearing loss (Bramhall et al., 2018b; Mehraei et al.,  
53 2016; Ridley et al., 2018), tinnitus (Bramhall et al., 2018a; Castaneda et al., 2019), site  
54 of lesions or tumors in the auditory system (Roeser et al., 2007) based on the way how  
55 the waveform is altered.

56

57 Although the ABR test itself is considered objective, the waveform recognition at near-  
58 threshold sound levels is not always trivial and requires visual inspection from trained  
59 professionals under established guidelines. Currently, the test still demands audiologists  
60 or clinicians who are experienced in this technique to conduct recordings and interpret  
61 outcomes on site, which raises the largest cost component in such test. Moreover,  
62 according to a previous report (Vidler et al., 2004) cases with limited consensus about  
63 the assessed hearing thresholds are not rare, because the accuracy of waveform  
64 recognition highly depends on the skill and the experience of the assessors, especially  
65 when untypical waveforms or high background noise level are encountered. As  
66 extensive hearing test is employed for instance to diagnose progressive and acquired

67 hearing loss in preschool children (Lu et al., 2014; Lu et al., 2011) as well as to evaluate  
68 drug ototoxicity, there is a clear need for an automated approach of high accuracy and  
69 robustness to make the test less labor-intensive and more objective.

70

71 Single-sweep ABR recordings are contaminated with background noise generated from  
72 muscle activity, adjacent power lines, etc. Therefore, it is almost exclusively required  
73 averaging over more than hundreds of sweeps to suppress random noise peaks, so that  
74 the signal-to-noise ratio (SNR) of the average responses is sufficient for an  
75 unambiguous ABR waveform recognition. In clinic, the waveform assessment is  
76 mainly based on visual inspecting of average responses and assisted by statistic  
77 measures like well-known single-point F ratio ( $F_{sp}$ ) to evaluate the signal and noise  
78 characteristics (Elberling et al., 1984). Despite of recent progress using machine  
79 learning (McKearney et al., 2019), reliable assessments still heavily involve human  
80 supervision in a semi-objective fashion. In the last few decades, several methods have  
81 been proposed to automate the procedure. With the criterion whether sweep averages  
82 or single-sweeps are processed, they fall into two major categories, namely feature- and  
83 statistics-based detection strategies (Dobie, 1993). The former utilizes either  
84 quantification of the similarity between measured waveforms and existing templates  
85 from database (Valderrama et al., 2014), or feature recognition using trained artificial  
86 neural networks on human-annotated datasets (Alpsan et al., 1991; McKearney et al.,  
87 2019), but detection accuracy is still limited by the waveform heterogeneity, varying  
88 data quality, as well as inconsistent training data (McKearney et al., 2019). The latter

89 measures either inter-sweep variability to detect stable signals using correlation  
90 function (Bershad et al., 1974; Weber et al., 1980; Xu et al., 1995) or level of residual  
91 noise (Don et al., 1994; Elberling et al., 1984) to describe the ‘quality’ of the signal  
92 through a scoring procedure, for which calibrations are needed for thresholding the  
93 signals with arbitrary boundary. Although some of these techniques have already been  
94 integrated in commercial devices, they are mainly employed for crosscheck purpose  
95 due to frequent detection errors caused by noise-related artifacts.

96

97 To better understand the noise and ABR characteristics, we first recorded from mice at  
98 each sound level hundreds of sweeps and found pairwise correlation coefficients of  
99 those sweeps followed a normal distribution. Upon declined sound levels, a series of  
100 peaks with shifted center towards zero were obtained as a result of progressively  
101 overwhelmed responses in noise. This implies consistent threshold detection by  
102 thresholding quantified correlation requires comparable SNRs across recordings and  
103 frequent calibration, however neither of which is practical under daily experimental  
104 settings. In the present study, we overcame this limitation by a novel approach using  
105 adaptive averaging, in which sweeps were added iteratively for averaging in order to  
106 test how many sweeps are required for stimulus-related waveform being detected  
107 through cross correlation measurement. The hearing threshold was then objectively  
108 estimated by modeling the change in the minimal sweep numbers at peri-threshold  
109 sound levels. The autodetected thresholds were found deviated from the expert-  
110 assessed ground truth consistently less than 5 dB. In addition, the minimal sweep

111 numbers are instructive for an efficient averaging strategy based on SNR adaptation.  
112 When implemented in commercial ABR devices, this automated approach could stop  
113 on-going averaging upon detected waveforms and save up to 69 % redundant sweeps  
114 according to our reconstructed experiments, and thereby shorten the test duration  
115 without compromising the accuracy of test results.

116

117

## 118 **MATERIALS AND METHODS**

### 119 **Animals and Ethics**

120 C57BL/6 mice (wt) were purchased from Sino-British SIPPR/BK Lab. Animal Ltd  
121 (Shanghai, China). The *terc*<sup>-/-</sup> mouse line was kindly donated by Lin Liu (Nankai  
122 University, China) and bred in house. This study is conducted at the Ear Institute and the  
123 Hearing and Speech Center of Shanghai Ninth People's Hospital. All procedures were  
124 reviewed and approved by the Institutional Authority for Laboratory Animal Care of  
125 the hospital (HKDL2018503).

126

### 127 **ABR recordings**

128 Mouse ABRs were recorded using a TDT RZ6/BioSigRZ system (Tuck-Davis Tech.  
129 Inc., US) in a sound-proof chamber. 7-week-old mice were anesthetized through  
130 intraperitoneal injection of hydrate chloride (500 mg/kg). Through the test, animal body  
131 temperature was maintained at around 37°C using a regulated heating pad (Harvard  
132 Apparatus, US) and rectal thermal probe. Electrical potential time courses were

133 registered via subdermal needle electrodes (Rochester Electro-Med. Inc., US) placed at  
134 vertex (record electrode), left infra-auricular mastoid region (reference electrode) and  
135 right shoulder region (ground electrode) of the test subjects. The acoustic stimuli of  
136 3 ms tone pips at 16 kHz were delivered via a multi-field magnetic speaker (Tuck-Davis  
137 Tech. Inc., US) positioned 10 cm from the vertex of the test subjects. The stimulus rate  
138 was 21 per second and the evoked potentials were sampled at 24 kHz. 500 sweeps were  
139 acquired at each test sound level starting from 90 dB to 0 dB with an increment of 5 dB.  
140 For one animal, we acquired signals evoked by peri-threshold sound levels ( $\pm 10$  dB  
141 with a 1-dB increment procedure).

142

143 Human ABRs were collected from four adult volunteers aged between 21 and 29 years-  
144 old without history in abnormal auditory function using a commercial device  
145 (Intelligent Hearing Systems, US) with Smart EP software. An electromagnetically  
146 shielded insert earphone (ER-3) was applied to deliver click stimulation to the left ear  
147 at a rate of 37.1 per second. The recorded potentials were amplified by a factor of  
148 100,000 and filtered with a 100 Hz (high-pass) and 3000 Hz (low-pass) filter. Averaged  
149 signals over 500, 1000, and 2000 sweeps were acquired 3 times at each test sound level  
150 starting from 60 dB to 0 dB with an increment of 5 dB.

151

## 152 **Analysis of single-sweep correlation**

153 Analysis of inter-sweep correlation was conduct in mouse recordings. All acquired  
154 single-sweep ABRs were analyzed using self-written routines in MATLAB

155 (MathWorks Inc., US). The artifact rejection level was set to 55  $\mu\text{V}$  and a high-pass  
156 filter (smoothing splines with a smoothing parameter of 0.5, MATLAB function) was  
157 applied to the raw data. The pairwise correlation was calculated using MATLAB  
158 function from sweeps cropped with a temporal window of 1-6 ms post-stimulation  
159 onset, resulting in 61,075 correlation coefficients from 350 sweeps at each test sound  
160 levels. The histograms of the obtained coefficients were fitted with a normal  
161 distribution.

162

### 163 **Adaptive averaging method**

164 For the mouse dataset, each iteration recruited 50 sweeps into MATLAB workspace  
165 until all 350 sweeps were added. Within iterations all sweeps in the workspace were  
166 subdivided randomly into two groups for separated averaging, between which a cross  
167 correlation function was computed using MATLAB function. The existence of  
168 stimulus-related waveform was tested based on whether the obtained correlation has a  
169 maximum at a lag less than 1% of total signal length (1-6 ms post-stimulation onset).  
170 In each iteration the lag value was measured three times with regrouped sweeps to reject  
171 cases with coincidentally overlapped signals at required lag value. For each sound level,  
172 it was measured at which iteration stimulus-related response was detected. The  
173 maximum number of executed iterations was set to 7, which is limited to total sweep  
174 numbers (after excessive amplitude exclusion). A sigmoid function (1) was employed  
175 to model the minimum required iteration numbers after normalization  $N(S)$  at each  
176 sound level  $S$  and a growth of 0.9 in the function corresponds to the estimated hearing



177 threshold  $T$ . The constant  $k$  equals 0.6, which was obtained from the best fitting.

$$178 \quad N(S) = \frac{1}{1+e^{-k(S-T)}} \quad (1)$$

179 As for the human dataset, averaged responses over 500, 1000 and 2000 sweeps were  
180 loaded in each iteration. Lag value was measured three times with a combination of 2  
181 out of 3 averaged responses of the same sweep number. The maximum executed  
182 iteration number was set to 7. For iterations requiring averages over 1500 or more than  
183 2000 sweeps, the combined average responses  $avg(M+N)$  containing  $M$  plus  $N$  sweeps  
184 were obtained from the weighted averaging of  $avg(M)$  and  $avg(N)$  using the equation  
185 (2).

$$186 \quad avg(M + N) = \frac{M \cdot avg(M) + N \cdot avg(N)}{M + N} \quad (2)$$

187

188 The maximal lag value allowed for a true ABR waveform was 2 % of the total signal  
189 length (0–10 ms post-stimulation onset). Same as for the mouse data, hearing threshold  
190 was interpolated from a fitting with sigmoid function at a growth of 0.9.

191

## 192 **Hearing Threshold Assessment**

193 All hearing thresholds were verified by visual inspection of five independent clinicians  
194 blinded to the test subjects. For each experiment, recordings averaged either over fixed  
195 sweep counts (the conventional averaging) or according to the outcomes from the  
196 adaptive averaging. Averaged audiograms were provided in MATLAB figures which  
197 enable interactive zoom function for better waveform recognition. Results were  
198 collected and mean values were calculated using the 3/5 method with the highest and

199 the lowest estimation dropped.

200

201

## RESULTS

### 202 **Correlations between Single-sweep ABR Recordings**

203 As ABRs are usually embedding in high level background activities as well as system  
204 noise, smooth baseline and clear waveform, if present, are usually obtained after an  
205 averaging over hundreds of sweeps (Fig 1 A). We recorded from mouse single-sweeps  
206 upon 16 kHz tone-pips at different levels of loudness. After a small fraction had been  
207 excluded due to excessive amplitudes caused by movement artifacts, more than 350  
208 sweeps were obtained and then filtered through a high-pass filter (Nishida et al., 1993)  
209 to remove low frequency fluctuations in short latency ABR components (Suppl 1).  
210 Pairwise correlations were computed from the sweeps cropped with a temporal window  
211 of 1-6 ms post-stimulation onset. The obtained correlation coefficients (CCs) at each  
212 sound level were found following normal distributions (Fig 1 B). When sweeps were  
213 recorded upon suprathreshold sound levels, corresponding shifts of the CC distributions  
214 were observed, indicating increased degrees of positive correlation. In line with  
215 previous studies (Galbraith, 2001), this result confirmed that ABR waveforms in single  
216 sweeps are highly correlated and measurable using correlation function. Moreover,  
217 when fit with a single gaussian function, invariable peak width ( $0.1778 \pm 0.0154$ ) was  
218 obtained from each distribution, implying reliable auditory responses with identical  
219 waveform and an add-on effect of constant uncorrelated noises.

220

221

## 222 **Objective Threshold Detection using Correlation Coefficients**

223 Next, we tested whether one can use correlation measurements to detect objectively the  
224 hearing thresholds. Recordings were performed using acoustic stimuli varying from 90  
225 dB to 0 dB in three wildtype mice (wt) of normal hearing and five telomerase-knock-  
226 out mice (*terc*<sup>-/-</sup>) of high percentage in deafness. Representative responses of a wt and  
227 a *terc*<sup>-/-</sup> animal were illustrated in Fig 2 A and the medians of CCs were plotted as a  
228 function of test sound levels (Fig 2 B). Between two rising phases, a shift of about  
229 30 dB was found, consistent with the threshold elevation estimated by visual inspection.  
230 This result confirmed CCs as a promising measure to detect the hearing threshold, as  
231 derived from early theoretical work (Bershad et al., 1974). In order to obtain a critical  
232 test boundary between supra- and sub-threshold sound level, we computed from eight  
233 animal at each sound level the medians of CCs and aligned them to the visual inspected  
234 thresholds (Fig 2 C). Sweeps upon stimuli above hearing threshold were found to have  
235 stronger positive correlation with a median greater than  $0.0119 \pm 0.0034$ . Although this  
236 empirically determined value could be used to threshold detectable ABRs, the detection  
237 accuracy was limited by close values obtained at near-threshold levels as well as inter-  
238 trial variability (data not shown).

239

240

## 241 **Adaptive Averaging Method**

242 It is impractical to keep identical recording conditions (including electrode position,

243 depth of anesthesia, etc.) for multiple recording sessions or perform frequent calibration  
244 before each experiment for daily use. In order to develop a more robust and applicable  
245 approach, we designed a novel procedure to adapt sweep number for averaging to the  
246 requirement for waveform detection. This means, instead of thresholding a detectable  
247 positive correlation using pre-calibrated critical test boundary, the new approach asks  
248 for how many sweeps are required to generate two average responses that are positively  
249 correlated above certain criterion (Fig 3 A). As the noise level is suppressed  
250 exponentially by averaging over increasing number of sweeps, this method adapts  
251 intrinsically to varying data quality and works in a calibration-free fashion.

252

253 In detail, recorded sweeps were randomly divided into two groups and cross correlation  
254 was calculated between group averages (Fig 3 C, see Fig 3 B for results using  
255 conventional averaging). In the presence of stimulus-related waveforms, one expected  
256 a neglectable lag (e.g. less than 1 % of analyzed data points) at which maximum  
257 correlation was found (Fig 3 D). To reject false positives caused by coincident overlap  
258 of noise peaks, each lag test required consistent results from three parallel  
259 measurements on regrouped sweeps. For each failed lag test, additional sweeps were  
260 added and the random split averaging was repeated, until a response was detected or  
261 the maximum number of iterations was reached. As shown in Fig 3 E, the number of  
262 executed iterations increased rapidly starting at near-threshold sound levels and  
263 reaching its maximum at the first subthreshold sound level as expected. Although the  
264 sharp transition allows direct readout of the lowest suprathreshold sound level, we

265 further tested whether precise estimation beyond the increment between test sound  
266 levels could be achieved by modeling the result (Fig 3 F). From one animal, sweeps  
267 were acquired upon peri-threshold sound levels with 1-dB increment and the increase  
268 in executed iterations was fit with a sigmoid function. Similar fit parameters were  
269 obtained from test datasets of 1-dB and 5-dB increment (Fig 3 F), indicating possible  
270 interpolation of the threshold from regular 5-dB increment procedure to achieve 1-dB  
271 detection precision based on the established model.

272

273

#### 274 **Accuracy and Efficiency of the Adaptive Averaging Method**

275 To evaluate the performance of the proposed adaptive averaging approach, we applied  
276 the procedure to ABR recordings from eight mice as well as four human test participants.  
277 Note that for human test, average responses were collected multiple times with different  
278 sweep numbers to simulate the random split averaging over sweeps (see Suppl 2 for the  
279 variant of flowchart), as the commercial devices in our hospital did not support  
280 exporting single-sweeps. When compared to the waveform assessments of five  
281 independent clinicians, the new approach yielded correct hearing threshold detection  
282 (deviated less than 5 dB from the expert-assessed ground truth) in 8/8 cases for mouse  
283 and 4/4 for human (Fig 4 A), indicating a detection accuracy of near human  
284 performance. In addition, visual inspection of the adaptive averaged responses and  
285 those averaging over a fixed sweep counts yielded similar test results (Fig 4 A),  
286 suggesting limited contribution of redundant sweeps in conventional averaging to

287 visual waveform recognition. When compared to the conventional averaging at all  
288 suprathreshold plus the first two subthreshold stimuli, the new method required up to  
289  $69.6 \pm 5.8 \%$  and  $36.2 \pm 21.1 \%$  less sweeps for a correct threshold estimation in the  
290 mouse and human ABR tests, respectively (Fig 4 B).

291

292

293

### Discussion

294 In the last few decades, attempts were made towards automated ABR analysis. Several  
295 techniques were proposed including the usage of correlation functions to discriminate  
296 stable components (ABR waveforms) from random fluctuations (system noise and  
297 background activities). In this study we found pairwise CCs between sweeps follows a  
298 normal distribution and medians of which reflect the power of stimulus-related  
299 waveform over baseline activities. The observed broadening of the distribution is  
300 probably caused by random fluctuations which by chance weak correlate or anti-  
301 correlate with the true responses. The observed constant peak widths for different test  
302 sound levels implies low variation in the ABR waveforms and comparable noise level  
303 within single recording session (Fig 1 B). This finding supports the notation that signal  
304 transmission in the auditory system is of high fidelity and SNR is the major challenge  
305 for detecting true hearing thresholds.

306

307 In practice, comparable SNRs are expected within single recording session except for  
308 electrode displacement or weak anesthesia (data not shown), allowing threshold

309 detection from a pre-calibrated system based on correlation measurement (Fig 2 C). It  
310 is, however, unrealistic to keep the same experimental settings including the same  
311 system, electrode position, anesthesia depth, etc. for different test subjects as well as in  
312 multiple recording sessions, hampering a plug-in application of correlation-based  
313 threshold autodetection. In fact, we showed CCs aligned to the hearing thresholds vary  
314 between 0.009 and 0.0199 due to different SNRs under our experimental settings (Fig  
315 2 C). This variation is about the same magnitude to those caused by different peri-  
316 threshold sound levels, which leads to limited detection accuracy.

317

318 The basic idea of the adaptive averaging approach is to keep a standard waveform  
319 detection criterion but adapt the SNR by iteratively increased sweep number for  
320 averaging. In previous study of middle latency response analysis (Xu et al., 1995), it  
321 has been proposed that neglectable lag in cross correlation between two consecutively  
322 recorded average signals can serve as a good indication for suprathreshold responses,  
323 because in contrast to stimulus-related responses, random distributed noise peaks may  
324 superimpose at any time shifts. Here we adapted this idea to detect ABR waveforms in  
325 two subgroup averages of sweeps. The underlying logic is as follows: one starts with  
326 constant noise level and unknown signal power; each iteration recruits more sweeps in  
327 the averaging to suppress progressively the noise level of the updated average responses  
328 until the true ABR waveform is no longer overwhelmed in noise and becomes  
329 detectable by cross correlation function. Thereby, one expects (1) converging lags to  
330 zero requires averaging over less sweeps for recordings containing strong responses

331 than those with weak responses; (2) the absence of response leads to non-converging  
332 lags irrespective of sweep numbers used for averaging. These are supported by our  
333 observations that detection of responses upon suprathreshold stimuli requires minimum  
334 number of iterations (Fig 3 E), as well as three-fold measured lags show large variation  
335 at subthreshold sound levels (Fig 3 D). The steep increase in the number of executed  
336 iterations (equivalent to sweep numbers used in averaging) is characteristic for the peri-  
337 threshold responses and insensitive to the absolute values of SNRs, enabling a  
338 calibration-free automatic threshold detection. Further we showed modeling of the  
339 number of executed iterations enables more precise threshold estimation beyond the  
340 increment of test sound levels through interpolation, in our case up to 1 dB (Fig 3 F).  
341 Alternatively, the adaptive averaging approach enables a test strategy with  
342 progressively reduced increment at peri-threshold sound levels to achieve required  
343 precision.

344

345 For both mouse and human recordings, the automated approach is extreme reliable in  
346 detecting hearing thresholds within a maximum error of  $\pm 5$  dB from the expert-  
347 assessed ground truths provided by five independent clinicians (Fig 4 A). Besides, the  
348 observation variation is comparable between the visual inspected groups either using  
349 conventional or adaptive averaging, as well as between visual inspection and automatic  
350 detection (Fig 4 A). Based on these results we conclude that the automated approach  
351 achieves accurate and robust threshold estimation of near human performance. When  
352 to stop averaging is an important decision to make during the ABR data collection, it



353 not only makes the hearing test more efficient by avoiding prolonged acquisition and  
354 redundant data, but also specifies the confidence level of waveform interpretation (Don  
355 et al., 1996). Since the underlying principle of the new approach is to average just  
356 enough sweeps for the SNR above detection limit, intrinsically it returns instruction to  
357 stop averaging when a response is detected. Meanwhile, it is temporally efficient to  
358 terminate test when previous iterations with higher sound levels fail to detect a response,  
359 because in this case acquired sweeps at lower sound level is supposed to contain pure  
360 noise. The reconstructed experiments to compare required sweep number by the  
361 adaptive averaging and the fixed sweep counts in the conventional averaging show a  
362 reduction up to 69 % and 36 % for mouse and human ABR test, respectively (Fig 4 B).  
363 Since the maximum sweep count used here to rule out undetectable ABRs was chosen  
364 more than necessary, further improvement can be made by introducing single-point F  
365 ratio (Elberling et al., 1984) or residual noise analysis (Don et al., 1994) to terminate  
366 averaging. In fact, the acquisition speed of modern ABR devices is usually not a  
367 limiting factor (more than 2000 sweep per minute), maybe more importantly the  
368 adaptive averaging approach sets the minimum requirement for the data quality that  
369 ensures unambiguous waveform recognition by both human and machine.

370

371 The present work has demonstrated a robust and efficient approach to automate hearing  
372 threshold detection from recorded ABRs. In contrast to other existing techniques, the  
373 basic idea of our approach is not to quantify how likely the recording contains a  
374 response, but for the first time to model how many sweeps are required for an averaged

375 response to counteract the background noise and become detectable by cross correlation  
376 function. By doing so, we bypassed the long-lasting challenges caused by varying SNR  
377 of ABR recordings and in addition obtained a strategy to stop averaging in an  
378 unsupervised fashion. Hence, the proposed method has a remarkable potential of being  
379 implemented in commercial ABR devices to make hearing test more reliable and cost-  
380 effective.

381

382

383

### References

- 384 Alpsan, D., Ozdamar, O. 1991. Brain-Stem Auditory Evoked-Potential Classification by  
385 Backpropagation Networks. *IEEE Trans. Inf. Theory* 38, 1266-1271.
- 386 Basbaum, A.I. 2008. *The senses : a comprehensive reference* Elsevier, Amsterdam ; New York.
- 387 Bershad, N.J., Rockmore, A.J. 1974. On estimating signal-to-noise ratio using the sample  
388 correlation coefficient. *IEEE Trans. Inf. Theory* IT-20, 112-113.
- 389 Bramhall, N.F., Konrad-Martin, D., McMillan, G.P. 2018a. Tinnitus and Auditory Perception After a  
390 History of Noise Exposure: Relationship to Auditory Brainstem Response Measures. *Ear  
391 Hear* 39, 881-894.
- 392 Bramhall, N.F., McMillan, G.P., Kujawa, S.G., Konrad-Martin, D. 2018b. Use of non-invasive  
393 measures to predict cochlear synapse counts. *Hear Res* 370, 113-119.
- 394 Castaneda, R., Natarajan, S., Yule Jeong, S., Na Hong, B., Ho Kang, T. 2019. Electrophysiological  
395 changes in auditory evoked potentials in rats with salicylate-induced tinnitus. *Brain Res.*
- 396 Dobie, R.A. 1993. Objective response detection. *Ear Hear* 14, 31-5.
- 397 Don, M., Elberling, C. 1994. Evaluating residual background noise in human auditory brain-stem  
398 responses. *J Acoust Soc Am* 96, 2746-57.
- 399 Don, M., Elberling, C. 1996. Use of quantitative measures of auditory brain-stem response peak  
400 amplitude and residual background noise in the decision to stop averaging. *J Acoust Soc  
401 Am* 99, 491-9.
- 402 Elberling, C., Don, M. 1984. Quality estimation of averaged auditory brainstem responses. *Scand  
403 Audiol* 13, 187-97.
- 404 Galbraith, G.C. 2001. Enhanced brainstem and cortical evoked response amplitudes: single-trial  
405 covariance analysis. *Percept Mot Skills* 92, 659-72.
- 406 Jacobson, J.T., Jacobson, C.A., Spahr, R.C. 1990. Automated and conventional ABR screening  
407 techniques in high-risk infants. *J Am Acad Audiol* 1, 187-95.
- 408 Jewett, D.L., Romano, M.N., Williston, J.S. 1970. Human auditory evoked potentials: possible brain  
409 stem components detected on the scalp. *Science* 167, 1517-8.
- 410 Lu, J., Huang, Z., Ma, Y., Li, Y., Mei, L., Yao, G., Wang, Y., Shen, X., Wu, H. 2014. Comparison between

- 411 hearing screening-detected cases and sporadic cases of delayed-onset hearing loss in  
412 preschool-age children. *Int J Audiol* 53, 229-34.
- 413 Lu, J., Huang, Z., Yang, T., Li, Y., Mei, L., Xiang, M., Chai, Y., Li, X., Li, L., Yao, G., Wang, Y., Shen, X.,  
414 Wu, H. 2011. Screening for delayed-onset hearing loss in preschool children who  
415 previously passed the newborn hearing screening. *Int J Pediatr Otorhinolaryngol* 75,  
416 1045-9.
- 417 McKearney, R.M., MacKinnon, R.C. 2019. Objective auditory brainstem response classification  
418 using machine learning. *Int J Audiol*, 1-7.
- 419 Mehraei, G., Hickox, A.E., Bharadwaj, H.M., Goldberg, H., Verhulst, S., Liberman, M.C., Shinn-  
420 Cunningham, B.G. 2016. Auditory Brainstem Response Latency in Noise as a Marker of  
421 Cochlear Synaptopathy. *J Neurosci* 36, 3755-64.
- 422 Nishida, S., Nakamura, M., Shibasaki, H. 1993. Method for single-trial recording of somatosensory  
423 evoked potentials. *J Biomed Eng* 15, 257-62.
- 424 Ridley, C.L., Kopun, J.G., Neely, S.T., Gorga, M.P., Rasetshwane, D.M. 2018. Using Thresholds in  
425 Noise to Identify Hidden Hearing Loss in Humans. *Ear Hear* 39, 829-844.
- 426 Roeser, R.J., Valente, M., Hosford-Dunn, H. 2007. *Audiology. Diagnosis*. 2nd ed. Thieme, New York.
- 427 Valderrama, J.T., de la Torre, A., Alvarez, I., Segura, J.C., Thornton, A.R., Sainz, M., Vargas, J.L. 2014.  
428 Automatic quality assessment and peak identification of auditory brainstem responses  
429 with fitted parametric peaks. *Comput Methods Programs Biomed* 114, 262-75.
- 430 Vidler, M., Parkert, D. 2004. Auditory brainstem response threshold estimation: subjective  
431 threshold estimation by experienced clinicians in a computer simulation of the clinical test.  
432 *Int J Audiol* 43, 417-29.
- 433 Weber, B.A., Fletcher, G.L. 1980. A computerized scoring procedure for auditory brainstem  
434 response audiometry. *Ear Hear* 1, 233-6.
- 435 Xu, Z.M., De Vel, E., Vinck, B., Van Cauwenberge, P. 1995. Application of cross-correlation function  
436 in the evaluation of objective MLR thresholds in the low and middle frequencies. *Scand*  
437 *Audiol* 24, 231-6.

438  
439

#### 440 **Acknowledgement**

441 We would like to thank Yun Li, Kun Han, Yan Ren, Lu Yang and Haifeng Li from  
442 Shanghai Ninth People's Hospital for help with ABR visual inspection. We would like  
443 to thank Dr. Guangming Chen and Dr. Lin Liu for providing terc-/- mice. This study  
444 was supported by The Program for Professor of Special Appointment (Eastern Scholar)  
445 at Shanghai Institutions of Higher Learning (QD2018015 to Y.H.), The Elite Program  
446 at Shanghai Ninth People's Hospital (JY201802 to Y.H., Z.H.), B.L was supported by  
447 The National Science Foundation for Young Scientists of China (No81700903) and The

448 SHIPM-mu Fund from Shanghai Institute of Precision Medicine (JC201808).

449

450

451

### Declarations of interest

452 The authors have declared that no conflicts of interest exist.

453

454

455

### Author contribution

456 Y.H., H.W designed the study; B.L. and X.D. acquired the data; Y.H. and H.Y.W created

457 the software; Y.H., H.Y.W., X.W, and Z.H., analyzed and interpreted the data. Y.H.,

458 H.Y.W., H.W drafted and revised the work.

459

460

461

### Figure Legends

462 **Figure 1.** Pairwise correlation coefficients of single-sweep ABR recordings. (A)

463 sweeps were recorded at 4 different sound levels (grey lines) and characteristic ABR

464 waveforms, if exist, were obtained via averaging (colored lines). (B) Histograms of

465 pairwise correlation coefficients that were computed from the recorded sweeps in A

466 (black lines). A normal distribution (colored lines) was used to fit each histogram. The

467 mean value of the resulted full width at haft maximum was  $0.1778 \pm 0.0154$  (mean  $\pm$

468 s.d.).

469

470 **Figure 2.** Threshold estimation using correlation coefficients. (A) Representative  
471 audiograms averaged over 350 sweeps were recorded from mice of normal (black lines)  
472 or impaired hearing (red lines). Waveforms with different peak amplitudes were  
473 observed for recordings at suprathreshold stimuli (above 25 dB for animal of normal  
474 hearing and 55 dB for animal of impaired hearing). (B) The same sweeps as for A were  
475 used to compute pairwise correlation coefficients at each sound level, respectively. The  
476 median correlation coefficients were plotted against corresponding test sound levels  
477 and fitted with a sigmoid function. Delayed raising of the medians upon increasing  
478 sound levels was observed in animal with impaired hearing, which is in line with the  
479 threshold elevation illustrated in A. (C) Median correlation coefficients at peri-  
480 threshold sound levels were measured from eight mice. Each curve was aligned to  
481 visual inspected thresholds at zero. Mean value of the median correlation coefficients  
482 at hearing threshold was  $0.0119 \pm 0.0034$  (mean  $\pm$  s.d.) varying between 0.0090 and  
483 0.0199.

484

485 **Figure 3.** Threshold detection using adaptive averaging method (A) Flowchart of the  
486 adaptive averaging method. (B) Representative mouse audiogram averaged over 350  
487 sweeps. The visual inspected threshold was between 25 dB and 30 dB. (C) Subgroup  
488 averages at each sound level (black versus grey lines) were obtained by averaging  
489 randomly split two groups of sweeps. The intermediate averages were updated by  
490 iterations for measuring the cross correlation. (D) The absolute lags in data point of the  
491 maximum cross correlation were three-fold measured at each test sound level. For

492 recordings upon suprathreshold stimuli (dots) a consistent small absolute lag values (no  
493 more than 1 data point) were obtained, while non-zero values with large variations  
494 ( $31.11 \pm 16.12$ ) were observed for cases of subthreshold stimuli (cycles). (E) In each  
495 iteration 50 new sweeps were added into the data pool for random split averaging, until  
496 the updated lag value was no more than k data point (in this case  $k = 1$ ). Minimum  
497 required iterations were plotted for tests upon suprathreshold (dots) and subthreshold  
498 sound levels (cycles) with an upper limit at 7 to avoid infinite iterations. It is  
499 recommended to stop a test, when the hearing threshold is confirmed by two  
500 consecutive runs without detectable waveforms (black cycles), so that iterations at  
501 lower test sound levels are saved (red cycles). (F) The stepwise increase in required  
502 iterations was fitted by a sigmoid function after normalization, allowing threshold  
503 interpolation beyond the increment of test sound levels. As calibrated with peri-  
504 threshold test with 1-dB increment, the most accurate threshold estimation corresponds  
505 to a growth of 0.9 in the best fitted function.

506

507 **Figure 4.** Performance of the adaptive averaging method in detecting hearing threshold.

508 (A) ABR recordings from mice ( $n=8$ ) and human participants ( $n=4$ ) were evaluated by  
509 5 independent clinicians or the automated approach. As ground truth, the mean  
510 thresholds were used which were based on human inspection of conventional averaged  
511 responses with the highest and the lowest value excluded. The thresholds reported by  
512 clinicians based on the mouse ABR audiograms using conventional averaging (fixed  
513 sweep counts, black dots) and the adaptive averaged responses (varying sweep numbers,

514 red dots) deviated from the expert-assessed ground truth by  $-0.250 \pm 2.719$  dB and  
515  $1.875 \pm 3.487$  dB, respectively, while it was  $0.000 \pm 3.590$  dB for the automatic detected  
516 threshold (red cycles). Similar results were obtained from human ABR audiograms with  
517 estimation deviations of  $-0.083 \pm 1.200$  dB for the conventional averaging (black dots)  
518 and  $0.083 \pm 1.200$  dB for the adaptive averaging (red dots) through visual inspection,  
519 compared to  $0.167 \pm 1.258$  dB for the automated approach (red cycles). (B) Total sweep  
520 numbers required for the adaptive averaging (black boxes) were compared to those used  
521 in the conventional averaging (red boxes). Within each experiment, sweep numbers at  
522 all suprathreshold levels and the first two subthreshold levels were counted and  
523 normalized to the default setting for averaging (350 sweeps for mouse ABR and 3000  
524 sweeps for human ABR). The adaptive averaging required  $30.4 \pm 5.8$  % sweeps in  
525 mouse ABR tests (left) and  $63.8 \pm 21.1$ % in human ABR tests (right) to perform  
526 successful threshold detection. Error bar represents standard deviation.

A

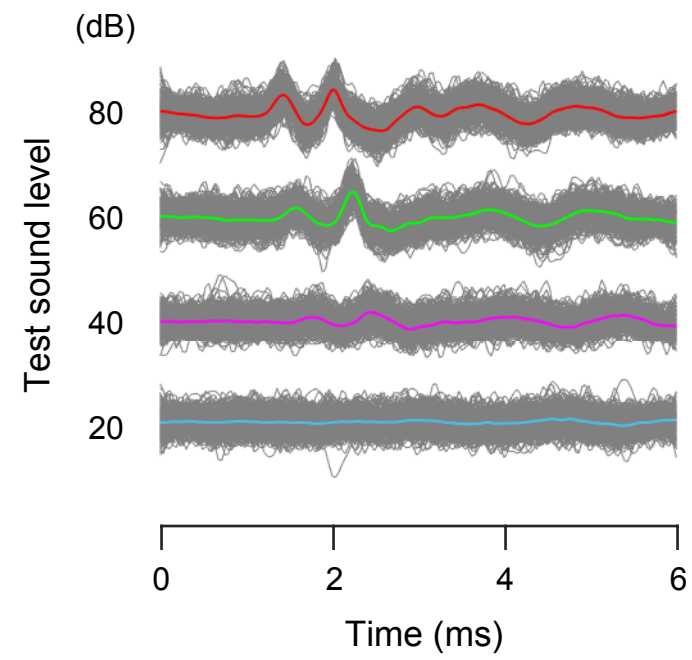

B

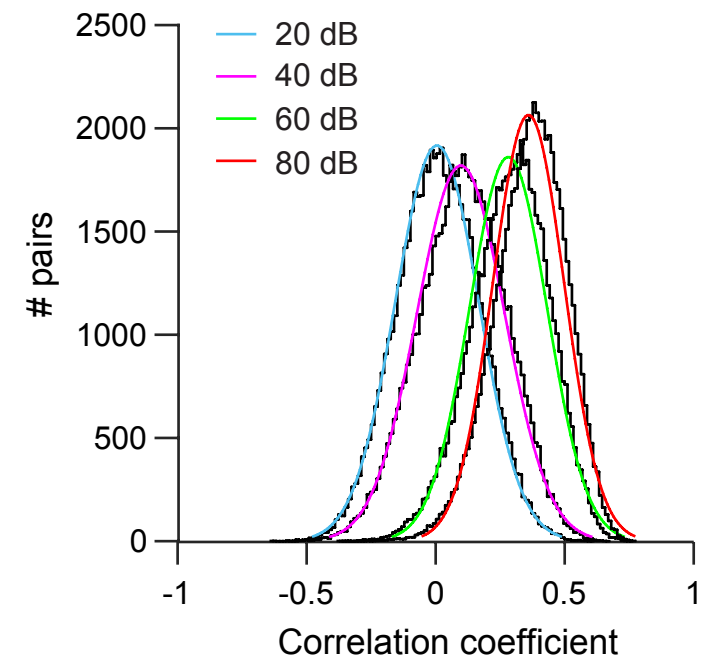

Wang et al., Fig 1



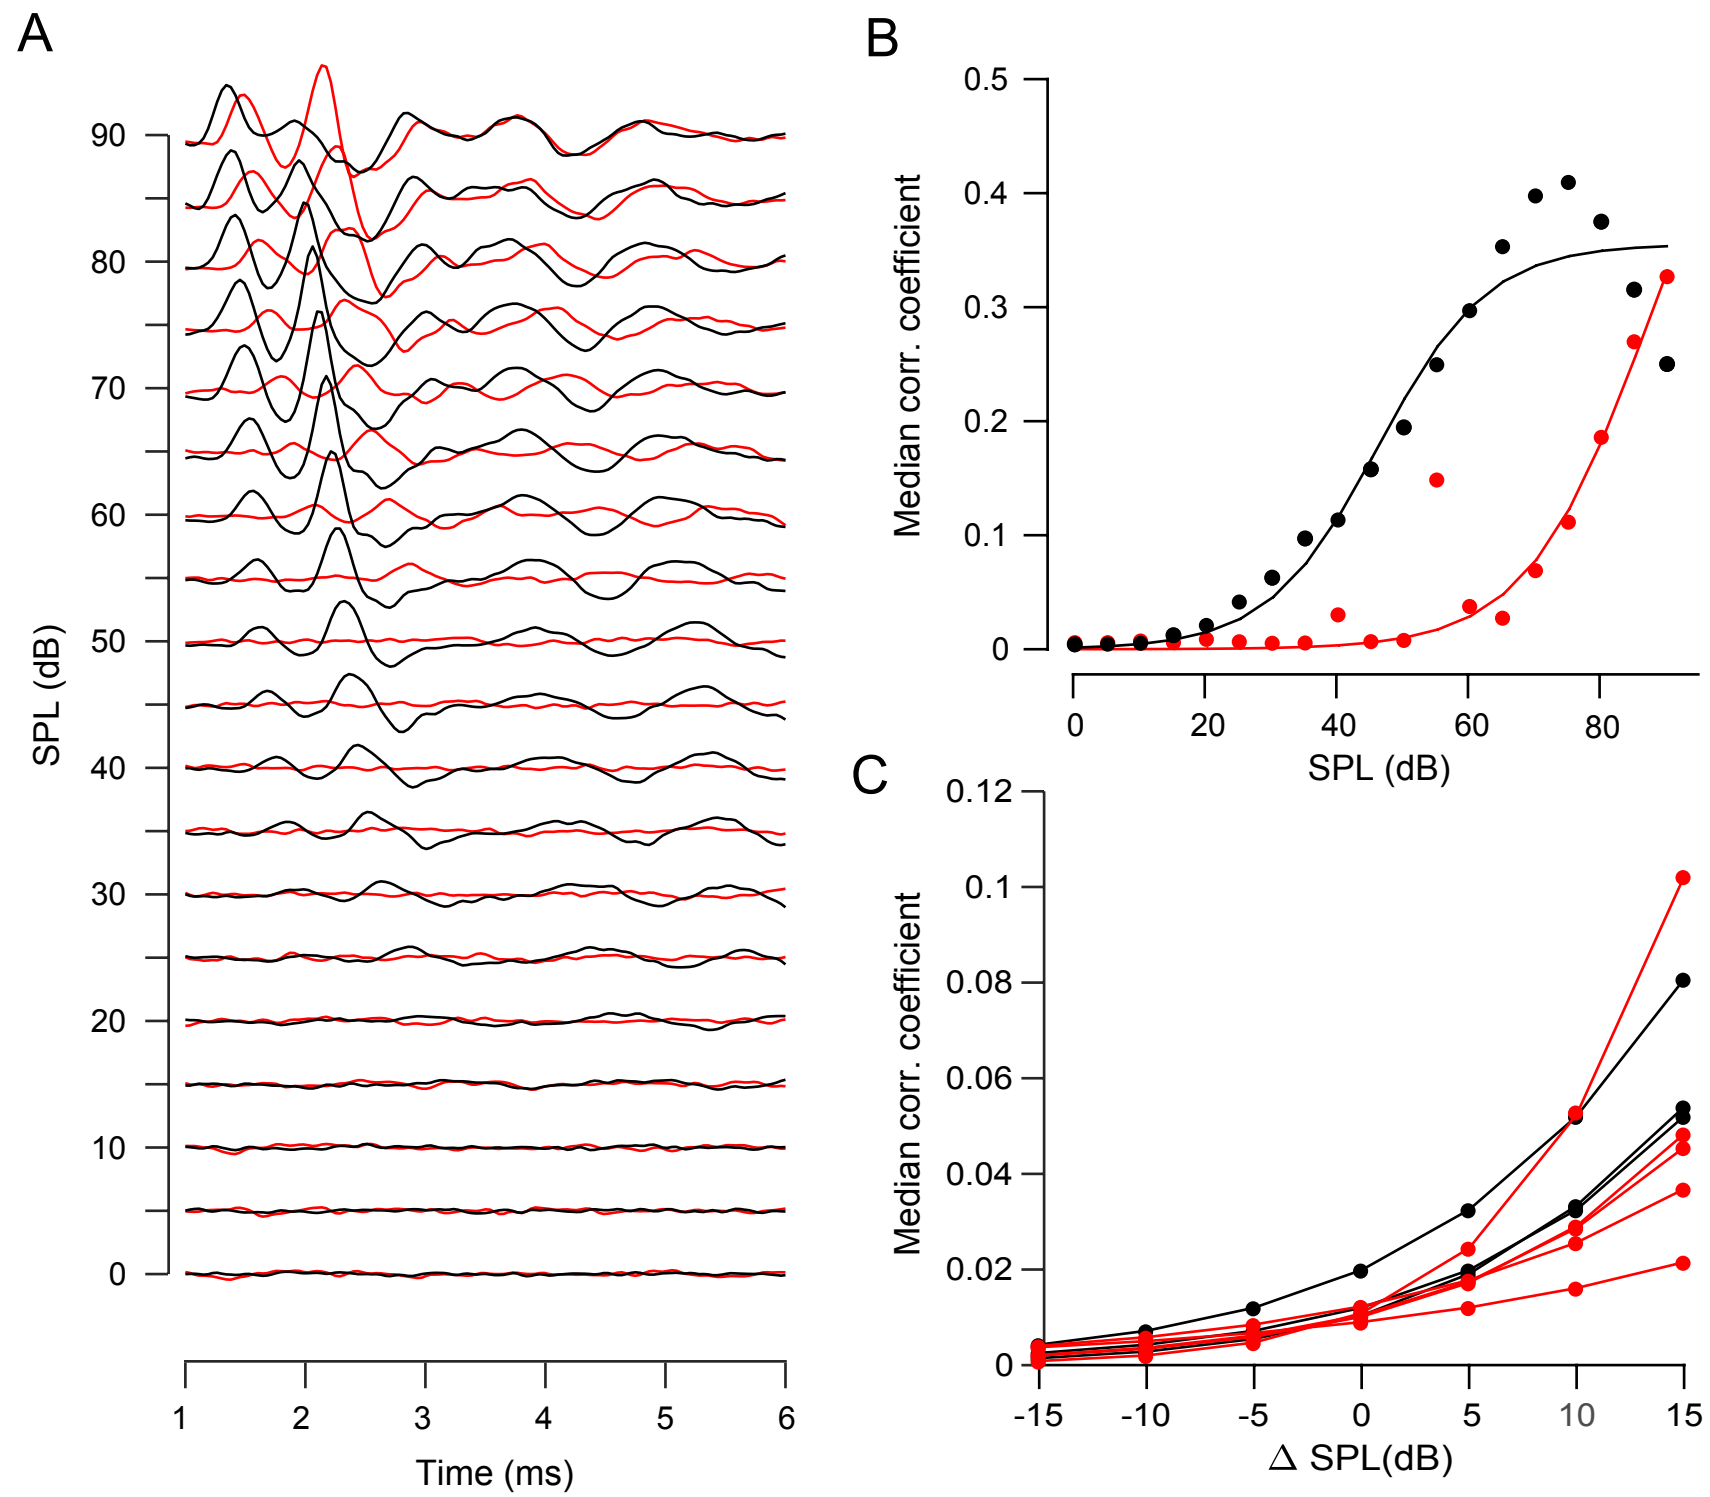

Wang et al., Fig 2

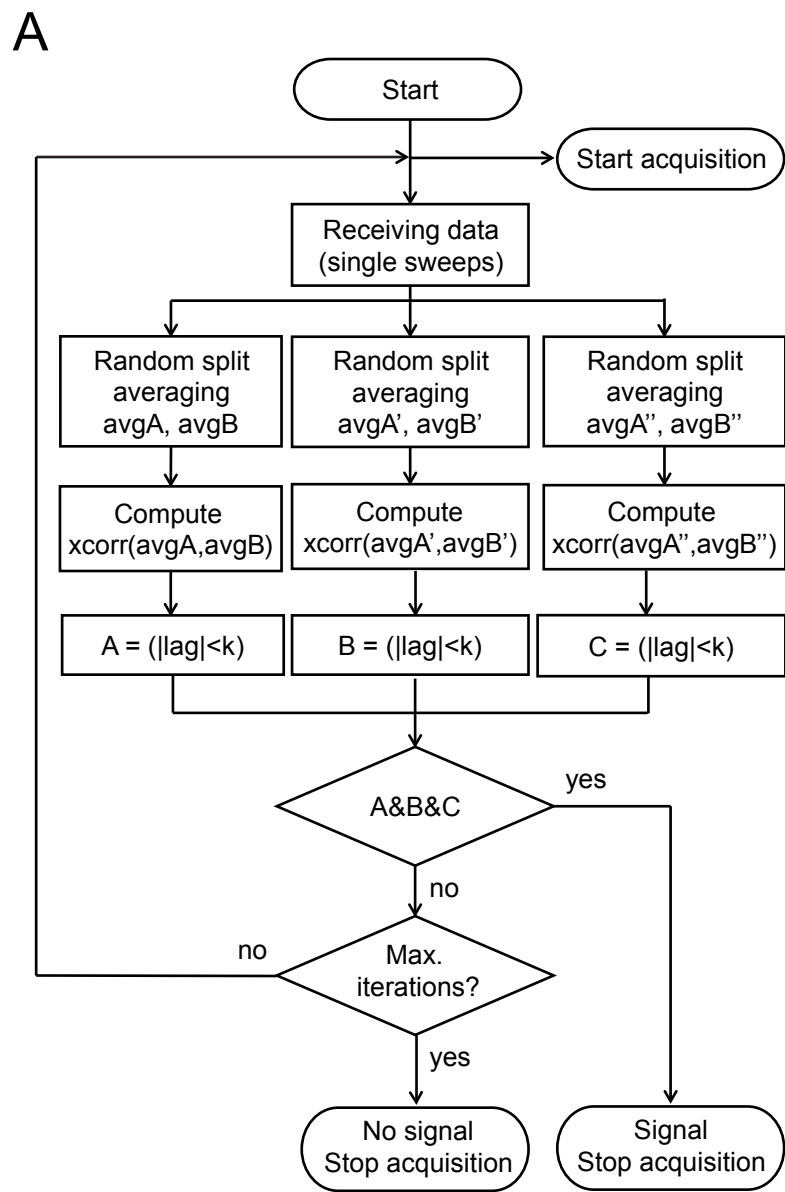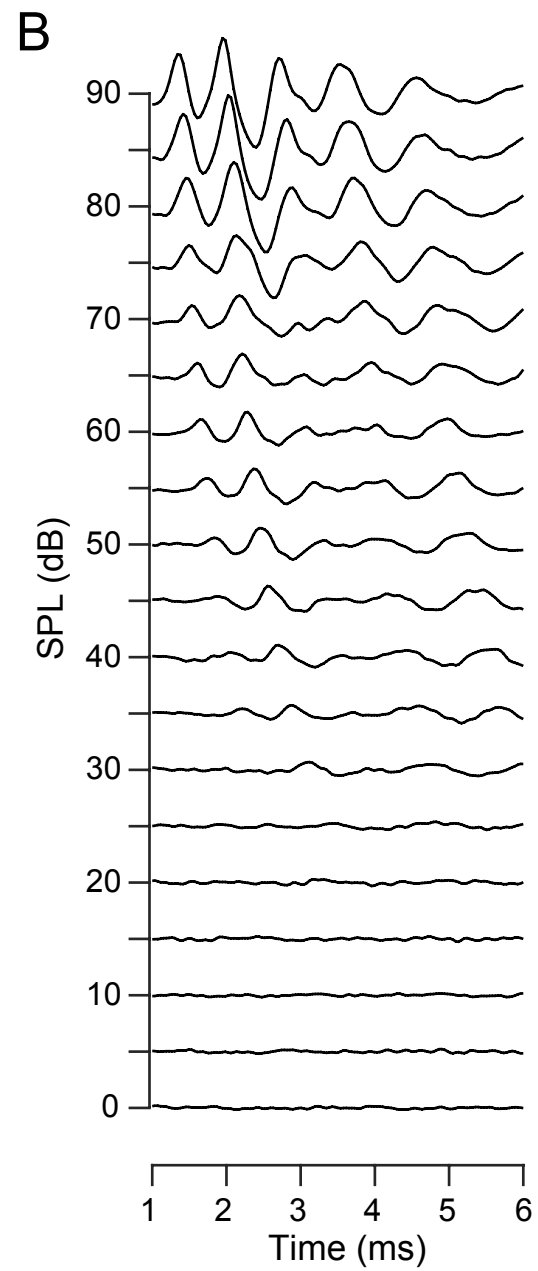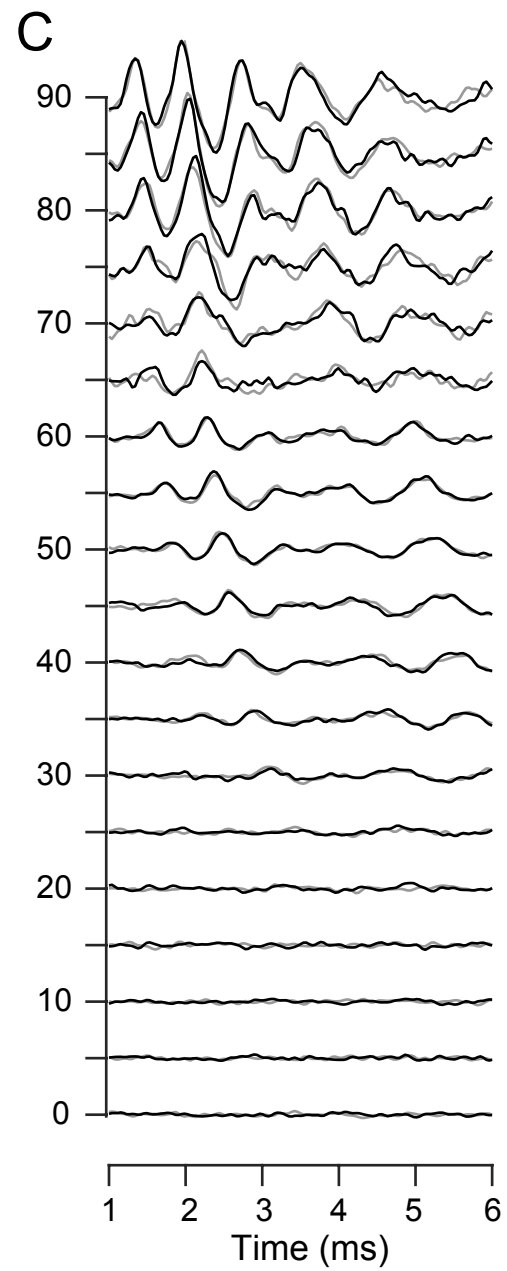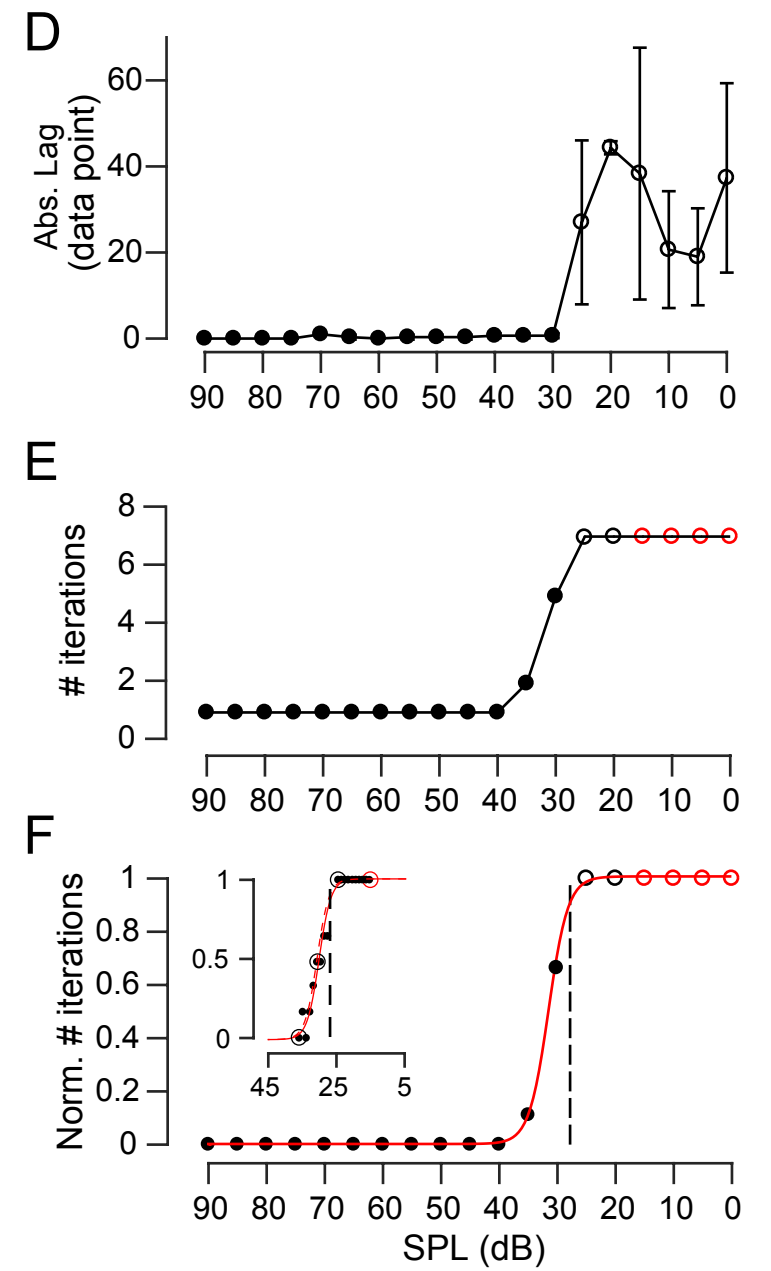

Wang et al., Fig 3

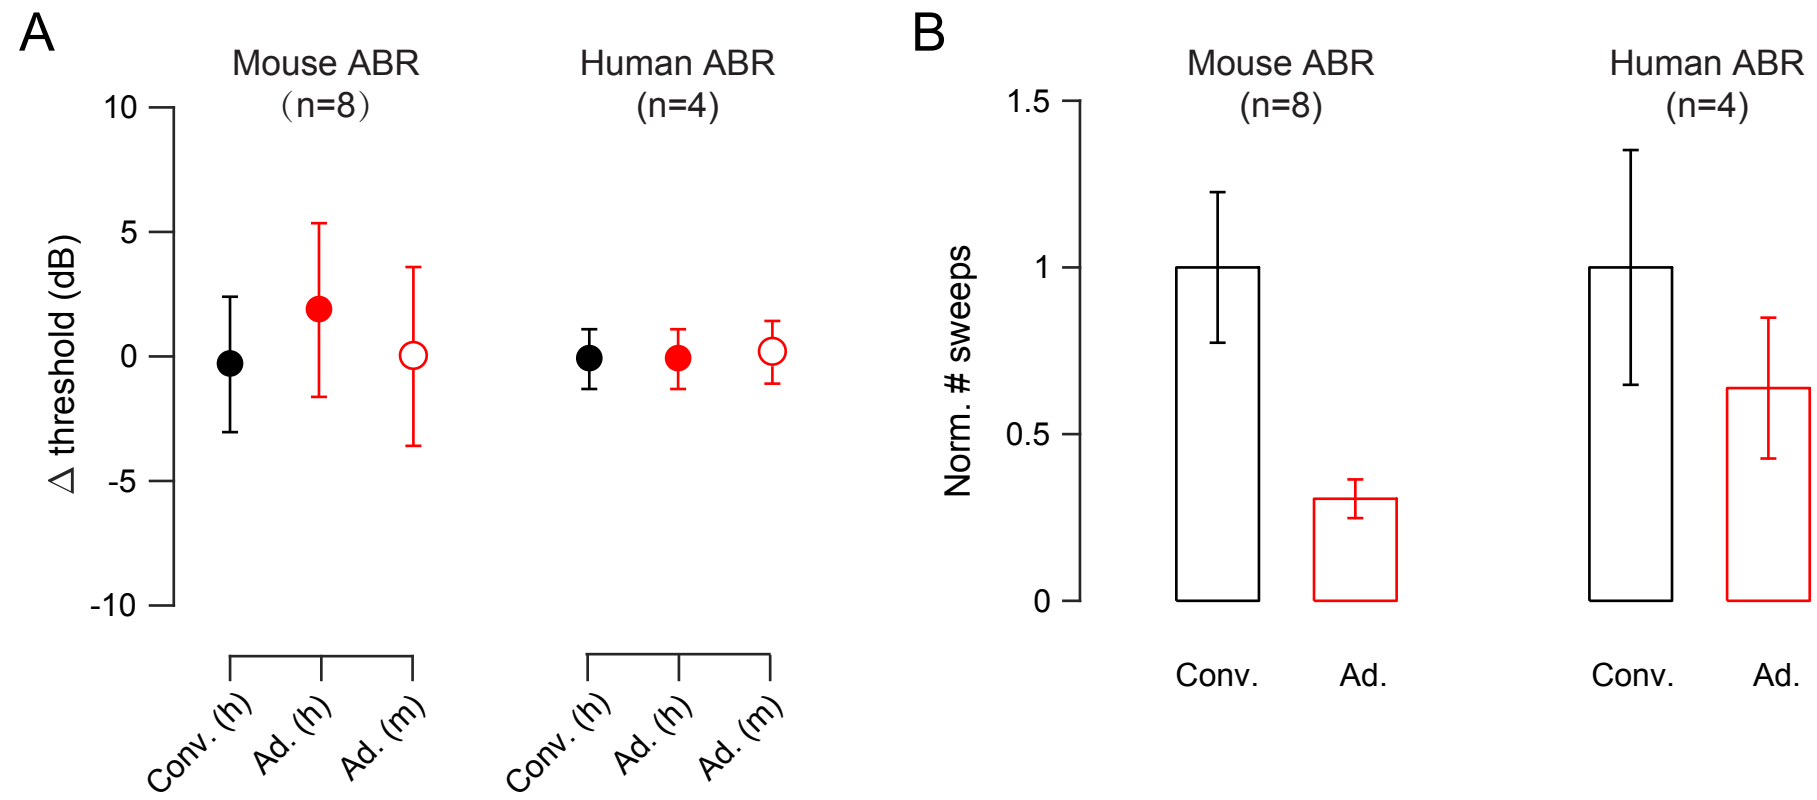

Wang et al., Fig 4
